# Supplementary material
Source: ML conference proceedings conference paper supplement (https://openreview.net/forum?id=ixOpURt7wC)
Supplement: supplementary_material [file appendix.pdf › appendix.pdf]

---

# Exploiting Dynamic Sparsity in Einsum (Technical Appendices)

submitted to Neurips 2025

---

Here we provide additional plots and extensive data tables for the experiments in the main paper.

## Contents

|   |                    |   |    |
|---|--------------------|---|----|
| 1 | Proof of Lemma 2   | 1 | 8  |
| 2 | Synthetic data     | 2 | 9  |
| 3 | Density evolution  | 3 | 10 |
| 4 | Runtime comparison | 4 | 11 |

## 1 Proof of Lemma 2

**Lemma 2.** *Contracting the tensor hypernetwork encoding of  $\text{GRID}_n$  needs at least  $2^n$  flops, when using multidimensional arrays.*

*Proof.* In Proposition 4.2 in Markov and Shi [2], it is shown that the size of the largest intermediate tensor, in terms of the number of axes, for any tensor (hyper-)network contraction order is lower bounded by the treewidth of the dual graph of the (hyper-)network. The dual graph of the tensor hypernetwork encoding of  $\text{GRID}_n$  is the  $(n \times n)$ -grid graph, whose vertices correspond to the variables  $x_{i,j}$  and whose edges correspond to the clauses. The dual graph of the tensor hypernetwork encoding of  $\text{GRID}_3$  is shown in Figure 1 of the main paper, where its vertices are represented by small gray bullets. Since the treewidth of an  $(n \times n)$ -grid graph is  $n$  and all axes are of length 2, the largest intermediate tensor has  $2^n$  entries, all of which need to be computed explicitly when using multidimensional arrays for the tensor encoding.  $\square$

## 2 Synthetic data

Median runtimes for the synthetic data for selected values of  $n$  are shown in Table 1. The runtime in the dense case grows exponentially with grid size, while the sparse case grows only quadratically. We stopped recording dense runtimes after  $n = 30$  due to excessive runtime. The sparse runtime remains low even at  $n = 128$ .

Table 1: Synthetic Data

| Grid Site Length ( $n$ ) | Dense Runtime (s) | Sparse Runtime (s) |
|--------------------------|-------------------|--------------------|
| 2                        | 0.000632          | 0.001335           |
| 5                        | 0.001317          | 0.001469           |
| 8                        | 0.003559          | 0.004170           |
| 11                       | 0.006530          | 0.009026           |
| 14                       | 0.017364          | 0.015918           |
| 17                       | 0.114016          | 0.028419           |
| 20                       | 0.213142          | 0.035368           |
| 23                       | 6.945333          | 0.032761           |
| 26                       | 61.066411         | 0.044847           |
| 29                       | 594.365473        | 0.058783           |
| 30                       | 1267.657151       | 0.064903           |
| 32                       | NaN               | 0.075265           |
| 44                       | NaN               | 0.141794           |
| 56                       | NaN               | 0.254500           |
| 68                       | NaN               | 0.431774           |
| 80                       | NaN               | 0.678623           |
| 92                       | NaN               | 0.991301           |
| 104                      | NaN               | 1.407768           |
| 116                      | NaN               | 1.778932           |
| 128                      | NaN               | 2.480547           |

### 3 Density evolution

29

Because Figure 3 of the main paper is rather small, we include a larger version of the same plot in Figure 7. In addition, we modified the colors and line styles for Group 3b to improve distinguishability.

30  
31

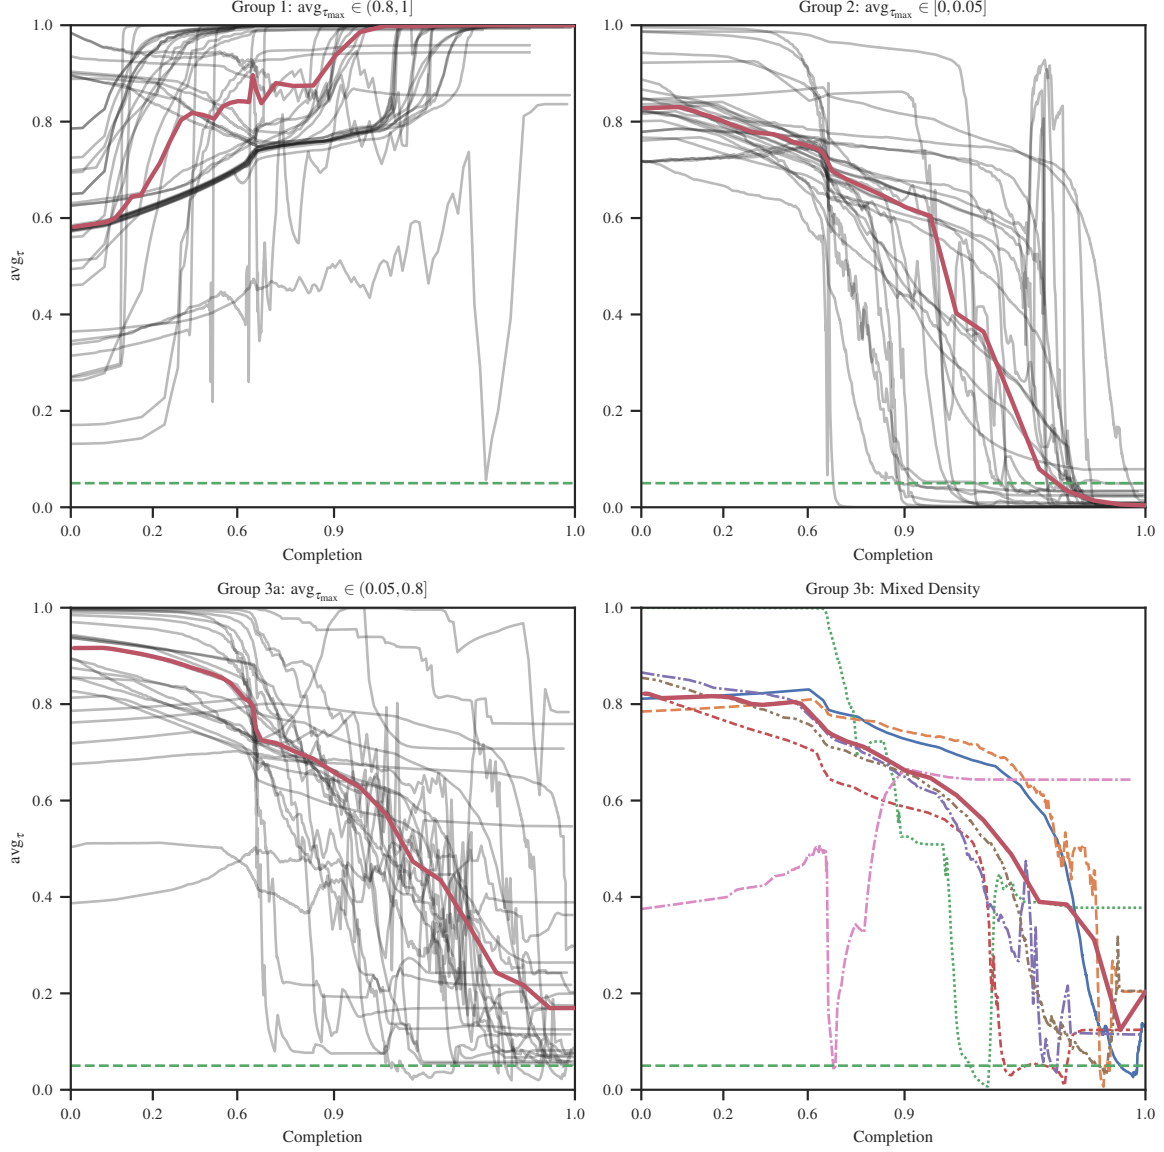

Figure 7: Evolution of average tensor density across instances, grouped by their final values. Within each group, a bold red line indicates the median density. The last group comprises instances transitioning from sparse ( $< 5\%$ ) to dense ( $> 10\%$ ). An exponential scaling at both ends is used along the x-axis to show the fraction of completed contractions. A green dashed line marks the 5% density threshold.

32

## 33 4 Runtime comparison

34 Table 2 shows the median runtimes for the dense, sparse, and hybrid implementations, as well as for the  
35 density estimation, on all benchmark einsum expressions compiled by Blacher et al. [1]. The bench-  
36 mark includes one contraction order optimized for minimal intermediate size and one for minimal  
37 floating-point operations (flops). We indicate which order was used in the *Path* column. Additionally,  
38 we report whether the hybrid implementation switched to the sparse tensor format, along with some  
39 instance metadata.

Table 2: Runtimes of the different implementations on the benchmark instances. The flops are reported as  $\log_{10}$ , the size as  $\log_2$ .

| Name                               | Flops | Size  | Path  | Average Density | Dense (s) | Sparse (s) | Hybrid (s) | Density (s) | Switched | DType      |
|------------------------------------|-------|-------|-------|-----------------|-----------|------------|------------|-------------|----------|------------|
| gm_1fas                            | 11.03 | 28.53 | flops | 0.91            | 3.66      | 218.15     | 3.87       | 7.96e-04    | No       | float64    |
| gm_1kp6                            | 10.40 | 27.77 | flops | 0.97            | 1.60      | 67.87      | 1.62       | 7.78e-04    | No       | float64    |
| gm_BN_13                           | 11.42 | 32.00 | flops | 1.00            | 87.83     | 1914.03    | 90.48      | 5.81e-04    | No       | float64    |
| gm_Promedas_33                     | 13.26 | 30.00 | size  | 0.08            | 16.39     | 185.09     | 16.35      | 7.19e-02    | No       | float64    |
| gm_mastermind_03_08_05-0000        | 11.27 | 30.00 | flops | 0.07            | 37.71     | 38.95      | 42.30      | 9.07e-03    | Yes      | float64    |
| gm_myciel5g_3_wcsp                 | 10.71 | 30.11 | flops | 1.00            | 22.67     | 438.57     | 23.70      | 4.84e-04    | No       | float64    |
| gm_pedigree38                      | 10.35 | 27.57 | flops | 0.17            | 2.29      | 7.38       | 2.32       | 2.92e-03    | No       | float64    |
| gm_pedigree50                      | 10.95 | 29.26 | flops | 0.84            | 4.14      | 90.07      | 4.01       | 4.76e-03    | No       | float64    |
| gm_queen5_5_3.wcsp                 | 9.75  | 26.94 | flops | 1.00            | 1.21      | 30.16      | 1.21       | 3.94e-04    | No       | float64    |
| lm_batch_likelihood_brackets_3_16d | 10.40 | 29.88 | flops | 1.00            | 3.34      | 75.88      | 3.38       | 2.14e-03    | No       | float64    |
| lm_batch_likelihood_brackets_4_12d | 10.99 | 28.11 | flops | 1.00            | 3.36      | 212.78     | 3.58       | 5.56e-03    | No       | float64    |
| lm_batch_likelihood_brackets_4_16d | 11.70 | 29.77 | flops | 1.00            | 9.28      | 993.96     | 9.95       | 7.32e-03    | No       | float64    |
| lm_batch_likelihood_brackets_4_4d  | 8.37  | 18.96 | flops | 1.00            | 0.02      | 1.17       | 0.03       | 2.27e-03    | No       | float64    |
| lm_batch_likelihood_sentence_3_12d | 9.20  | 20.86 | flops | 1.00            | 0.35      | 3.53       | 0.24       | 1.75e-03    | No       | float64    |
| lm_batch_likelihood_sentence_4_12d | 11.07 | 25.23 | flops | 1.00            | 1.92      | 215.30     | 1.72       | 5.17e-03    | No       | float64    |
| lm_batch_likelihood_sentence_4_14c | 11.43 | 29.58 | flops | 1.00            | 14.83     | 568.80     | 14.76      | 7.55e-03    | No       | complex128 |
| lm_batch_likelihood_sentence_4_16c | 11.82 | 26.89 | flops | 1.00            | 7.67      | 1199.84    | 7.91       | 7.15e-03    | No       | complex128 |
| lm_batch_likelihood_sentence_4_16d | 11.82 | 26.89 | flops | 1.00            | 4.22      | 1205.42    | 4.11       | 4.61e-03    | No       | float64    |
| lm_batch_likelihood_sentence_4_18c | 12.12 | 27.57 | flops | 1.00            | 12.04     | 2319.38    | 12.19      | 6.94e-03    | No       | complex128 |
| lm_batch_likelihood_sentence_4_20c | 12.34 | 31.64 | flops | 1.00            | 34.83     | 3947.27    | 35.60      | 8.67e-03    | No       | complex128 |
| lm_batch_likelihood_sentence_4_20d | 12.34 | 31.64 | flops | 1.00            | 25.38     | 4012.05    | 25.42      | 5.50e-03    | No       | float64    |
| lm_batch_likelihood_sentence_4_20d | 12.34 | 31.64 | flops | 1.00            | 25.38     | 4012.05    | 25.42      | 5.50e-03    | No       | float64    |

Continued on next page

Table 2: Runtimes of the different implementations on the benchmark instances. The flops are reported as  $\log_{10}$ , the size as  $\log_2$ .

| Name                            | Flops | Size  | Path  | Average Density | Dense (s) | Sparse (s) | Hybrid (s) | Density (s) | Switched | DType      |
|---------------------------------|-------|-------|-------|-----------------|-----------|------------|------------|-------------|----------|------------|
| __4d                            | 8.46  | 18.89 | flops | 1.00            | 0.07      | 1.22       | 0.05       | 1.81e-03    | No       | float64    |
| lm_batch_likelihood_sentence_4_ |       |       |       |                 |           |            |            |             |          |            |
| __8d                            | 10.04 | 22.89 | flops | 1.00            | 0.62      | 24.59      | 0.57       | 3.92e-03    | No       | float64    |
| lm_first_last_brackets_4_16d    | 12.75 | 29.61 | flops | 1.00            | 8.34      | 9648.99    | 8.29       | 1.33e-03    | No       | float64    |
| lm_first_last_sentence_4_14c    | 12.28 | 26.65 | flops | 1.00            | 5.51      | 3194.48    | 5.44       | 1.77e-03    | No       | complex128 |
| lm_first_last_sentence_4_16c    | 12.85 | 30.92 | flops | 1.00            | 35.56     | 12026.60   | 36.35      | 2.32e-03    | No       | complex128 |
| lm_first_last_sentence_4_16d    | 12.85 | 30.92 | flops | 1.00            | 16.89     | 12169.89   | 17.36      | 1.69e-03    | No       | float64    |
| mc_2020_017                     | 9.65  | 22.00 | flops | 0.05            | 4.23      | 1.77       | 2.58       | 1.09e-02    | Yes      | int32      |
| mc_2020_062                     | 10.41 | 25.00 | flops | 0.13            | 13.17     | 9.74       | 10.48      | 5.45e-02    | Yes      | int64      |
| mc_2020_082                     | 10.59 | 24.00 | flops | 0.09            | 7.07      | 9.87       | 11.46      | 8.25e-02    | Yes      | float64    |
| mc_2020_175                     | 12.85 | 32.00 | size  | 0.20            | 46.17     | 460.45     | 481.97     | 5.40e-03    | Yes      | float64    |
| mc_2020_arjun_042               | 10.28 | 28.00 | flops | 0.02            | 19.92     | 3.55       | 10.73      | 1.60e-02    | Yes      | int64      |
| mc_2020_arjun_046               | 9.08  | 24.00 | flops | 0.22            | 0.86      | 1.62       | 1.09       | 4.80e-03    | No       | int64      |
| mc_2020_arjun_057               | 9.01  | 24.00 | flops | 0.06            | 0.76      | 0.38       | 0.84       | 3.72e-03    | No       | int32      |
| mc_2020_arjun_061               | 10.62 | 28.00 | flops | 0.55            | 2.36      | 38.29      | 2.30       | 2.69e-03    | No       | float64    |
| mc_2020_arjun_102               | 10.07 | 26.00 | flops | 0.07            | 0.95      | 2.70       | 0.93       | 6.76e-03    | No       | float64    |
| mc_2020_arjun_115               | 11.13 | 30.00 | flops | 0.13            | 79.21     | 210.94     | 77.87      | 2.17e-01    | No       | float64    |
| mc_2021_027                     | 8.62  | 23.00 | flops | 0.00            | 0.20      | 0.02       | 0.16       | 4.93e-04    | Yes      | int16      |
| mc_2021_036                     | 11.64 | 30.00 | flops | 0.00            | 124.67    | 1.28       | 0.41       | 3.78e-03    | Yes      | float64    |
| mc_2021_065                     | 9.37  | 26.00 | flops | 0.06            | 2.57      | 0.66       | 2.59       | 7.63e-03    | No       | int64      |
| mc_2021_074                     | 10.33 | 28.00 | flops | 0.17            | 16.20     | 17.86      | 16.59      | 3.64e-02    | No       | int32      |
| mc_2021_075                     | 9.70  | 27.00 | flops | 1.00            | 2.44      | 44.66      | 2.61       | 6.45e-04    | No       | float64    |
| mc_2021_arjun_007               | 13.58 | 31.00 | size  | 0.17            | 43.09     | 6580.91    | 46.17      | 3.83e-03    | No       | float64    |
| mc_2021_arjun_031               | 12.77 | 32.00 | flops | 0.38            | 131.48    | 7337.47    | 138.82     | 2.82e-03    | No       | float64    |
| mc_2021_arjun_171               | 9.68  | 25.00 | flops | 0.36            | 0.50      | 4.36       | 0.56       | 7.73e-03    | No       | float64    |
| mc_2021_arjun_179               | 10.15 | 28.00 | flops | 0.76            | 4.47      | 51.02      | 4.70       | 1.99e-02    | No       | float64    |
| mc_2022_025                     | 9.85  | 27.00 | flops | 0.01            | 0.90      | 0.25       | 0.28       | 1.64e-03    | Yes      | float64    |
| mc_2022_029                     | 10.11 | 27.00 | flops | 0.01            | 1.92      | 0.37       | 0.31       | 2.34e-03    | Yes      | float64    |
| mc_2022_079                     | 6.63  | 12.00 | flops | 0.04            | 0.13      | 0.06       | 0.09       | 0.00e+00    | No       | float64    |
| mc_2022_085                     | 11.49 | 29.00 | size  | 0.20            | 197.36    | 175.87     | 193.23     | 2.11e-01    | No       | int64      |
| mc_2022_087                     | 10.90 | 27.00 | flops | 0.00            | 18.54     | 0.30       | 0.29       | 3.12e-03    | Yes      | float64    |
| mc_2022_167                     | 6.86  | 6.00  | flops | 0.56            | 9.57      | 6.42       | 10.76      | 0.00e+00    | No       | int16      |
| mc_2022_arjun_037               | 12.04 | 28.00 | size  | 0.78            | 1.73      | 121.21     | 2.11       | 4.84e-03    | No       | float64    |
| mc_2022_arjun_069               | 12.95 | 31.00 | size  | 0.12            | 715.55    | 88.67      | 88.23      | 2.68e-03    | Yes      | int64      |

Continued on next page

Table 2: Runtimes of the different implementations on the benchmark instances. The flops are reported as  $\log_{10}$ , the size as  $\log_2$ .

| Name                                                          | Flops | Size  | Path  | Average Density | Dense (s) | Sparse (s) | Hybrid (s) | Density (s) | Switched | DType      |
|---------------------------------------------------------------|-------|-------|-------|-----------------|-----------|------------|------------|-------------|----------|------------|
| mc_2023_002                                                   | 7.19  | 17.00 | flops | 0.25            | 0.39      | 0.31       | 0.42       | 3.26e-03    | No       | float64    |
| mc_2023_075                                                   | 11.57 | 29.00 | flops | 0.00            | 103.34    | 0.21       | 0.36       | 4.06e-03    | Yes      | float64    |
| mc_2023_151                                                   | 12.47 | 33.00 | flops | 0.12            | 168.54    | 324.54     | 325.05     | 8.00e-03    | Yes      | float64    |
| mc_2023_186                                                   | 11.21 | 28.00 | flops | 0.02            | 30.42     | 15.45      | 14.50      | 6.39e-03    | Yes      | float64    |
| mc_2023_188                                                   | 9.21  | 20.00 | flops | 0.06            | 0.66      | 1.10       | 0.66       | 7.05e-03    | No       | float64    |
| mc_2023_199                                                   | 10.73 | 30.00 | flops | 0.24            | 25.21     | 56.61      | 25.95      | 5.89e-02    | No       | int64      |
| mc_2023_arjun_071                                             | 12.43 | 29.00 | size  | 0.03            | 263.95    | 41.82      | 269.42     | 8.72e-02    | No       | int64      |
| mc_2023_arjun_117                                             | 9.79  | 23.00 | flops | 0.20            | 1.09      | 4.15       | 1.09       | 1.25e-02    | No       | float64    |
| mc_2023_arjun_133                                             | 11.60 | 32.00 | flops | 0.39            | 76.25     | 524.98     | 69.68      | 2.30e-01    | No       | float64    |
| mc_rw_32.sk_4_38                                              | 11.38 | 30.00 | flops | 0.00            | 158.72    | 0.36       | 0.44       | 3.25e-03    | Yes      | int32      |
| mc_rw_blasted_TR_b14_1_linear                                 | 11.85 | 32.00 | flops | 0.08            | 148.01    | 230.04     | 230.83     | 1.02e-02    | Yes      | float64    |
| mc_rw_blasted_case1_b14_even3                                 | 9.79  | 23.00 | flops | 0.01            | 1.71      | 0.57       | 1.20       | 6.10e-03    | Yes      | float64    |
| mc_rw_blasted_case3                                           | 10.43 | 29.00 | flops | 0.11            | 16.40     | 4.75       | 4.65       | 2.06e-03    | Yes      | int32      |
| mc_rw_blasted_squaring12                                      | 12.87 | 33.00 | flops | 0.21            | 743.14    | 383.79     | 354.24     | 4.07e-02    | Yes      | int64      |
| mc_rw_blockmap_05_01.net                                      | 11.11 | 30.00 | flops | 0.03            | 36.34     | 5.19       | 5.50       | 3.91e-03    | Yes      | int16      |
| mc_rw_c1908.isc                                               | 12.66 | 31.00 | size  | 0.05            | 371.38    | 53.10      | 59.11      | 1.94e-02    | Yes      | int64      |
| mc_rw_c7552.isc                                               | 10.31 | 26.00 | flops | 0.08            | 1.66      | 3.19       | 3.03       | 6.37e-03    | Yes      | float64    |
| mc_rw_log-1                                                   | 12.31 | 35.00 | flops | 0.00            | 509.55    | 0.63       | 0.67       | 5.01e-03    | Yes      | float64    |
| mc_rw_or-70-20-4                                              | 10.30 | 29.00 | flops | 1.00            | 10.60     | 191.04     | 10.61      | 3.76e-04    | No       | float64    |
| mc_rw_or-70-5-6-UC-10                                         | 10.60 | 30.00 | flops | 0.71            | 30.10     | 176.21     | 29.74      | 2.91e-04    | No       | int64      |
| mc_rw_s510.bench                                              | 11.33 | 32.00 | flops | 0.01            | 132.42    | 5.70       | 6.12       | 2.40e-03    | Yes      | int32      |
| mc_rw_s510_15_7                                               | 11.49 | 32.00 | flops | 0.00            | 298.14    | 3.31       | 3.57       | 1.39e-03    | Yes      | int32      |
| mc_rw_sat-grid-pbl-0020                                       | 12.34 | 28.00 | flops | 0.85            | 4.71      | 3008.33    | 4.74       | 3.08e-02    | No       | float64    |
| qc_circuit_n47_m14_s0_e0_pEFGH                                | 11.46 | 30.00 | flops | 1.00            | 75.23     | 1101.99    | 77.69      | 1.04e-03    | No       | complex128 |
| qc_circuit_n49_m14_s9_e6_pEFGH_...simplified                  | 9.81  | 25.00 | flops | 1.00            | 3.24      | 26.57      | 3.25       | 1.01e-03    | No       | complex128 |
| qc_circuit_n53_m12_s2_e8_pABCD_...CDAB_simplified             | 9.88  | 25.00 | flops | 1.00            | 3.61      | 35.78      | 3.68       | 9.33e-04    | No       | complex128 |
| qc_circuit_n53_m20_s5_e22_pABC_...DCDAB                       | 11.03 | 27.00 | flops | 1.00            | 32.62     | 436.79     | 33.34      | 8.50e-04    | No       | complex128 |
| qc_circuit_patch_n53_m16_s10_e_...28_pABCD_...CDAB            | 10.63 | 27.00 | flops | 1.00            | 24.08     | 253.03     | 24.27      | 1.25e-03    | No       | complex128 |
| qc_circuit_patch_n53_m16_s19_e_...28_pABCD_...CDAB_simplified | 10.63 | 27.00 | flops | 1.00            | 23.17     | 246.13     | 23.42      | 1.18e-03    | No       | complex128 |

Continued on next page

Table 2: Runtimes of the different implementations on the benchmark instances. The flops are reported as  $\log_{10}$ , the size as  $\log_2$ .

| Name                         | Flops | Size  | Path  | Average Density | Dense (s) | Sparse (s) | Hybrid (s) | Density (s) | Switched | DType      |
|------------------------------|-------|-------|-------|-----------------|-----------|------------|------------|-------------|----------|------------|
| qc_circuits-1                | 8.84  | 20.00 | flops | 1.00            | 0.16      | 2.84       | 0.15       | 8.29e-04    | No       | complex128 |
| qc_circuits-14               | 11.03 | 27.00 | flops | 1.00            | 18.68     | 423.88     | 18.77      | 9.99e-04    | No       | complex64  |
| qc_circuits-18               | 11.99 | 31.00 | flops | 1.00            | 190.66    | 4670.79    | 190.87     | 1.07e-03    | No       | complex64  |
| qc_circuits-2                | 10.98 | 27.00 | flops | 1.00            | 18.85     | 408.10     | 19.10      | 1.61e-03    | No       | complex64  |
| qc_circuits-35               | 9.69  | 25.00 | flops | 1.00            | 1.17      | 14.88      | 1.18       | 1.02e-03    | No       | complex128 |
| qc_circuits-42               | 10.29 | 26.00 | flops | 1.00            | 4.01      | 63.69      | 4.81       | 7.12e-04    | No       | complex128 |
| qc_circuits-7                | 10.29 | 26.00 | flops | 1.00            | 2.49      | 64.10      | 2.49       | 8.62e-04    | No       | complex64  |
| qc_circuits-8                | 8.43  | 20.00 | flops | 1.00            | 0.14      | 1.43       | 0.10       | 7.56e-04    | No       | complex128 |
| qc_maxcut_n18_r17_p100       | 10.50 | 18.00 | flops | 1.00            | 9.10      | 222.84     | 8.95       | 5.78e-02    | No       | complex128 |
| qc_maxcut_n24_r20_p10        | 11.46 | 24.00 | flops | 1.00            | 226.95    | 1678.78    | 225.57     | 1.13e-02    | No       | complex128 |
| qc_maxcut_n25_r4_p4          | 10.42 | 25.00 | flops | 1.00            | 10.56     | 95.25      | 10.49      | 2.57e-03    | No       | complex128 |
| qc_maxcut_n27_r6_p5          | 11.43 | 27.00 | flops | 1.00            | 180.83    | 1730.15    | 181.20     | 2.66e-03    | No       | complex128 |
| qc_maxcut_n28_r3_p3          | 9.29  | 23.00 | flops | 0.64            | 1.04      | 3.78       | 3.69       | 1.56e-03    | Yes      | complex128 |
| qc_maxcut_n29_r4_p10         | 12.29 | 29.00 | flops | 0.99            | 1109.70   | 12467.45   | 1106.18    | 9.04e-03    | No       | complex128 |
| qc_qft_27                    | 9.13  | 27.00 | flops | 1.00            | 1.37      | 25.06      | 1.34       | 1.92e-03    | No       | complex128 |
| qc_qft_28                    | 9.43  | 28.00 | flops | 1.00            | 1.48      | 45.32      | 1.42       | 1.97e-03    | No       | complex64  |
| qc_qft_30                    | 10.03 | 30.00 | flops | 1.00            | 5.21      | 194.04     | 5.08       | 2.24e-03    | No       | complex64  |
| qc_rand_google53_25_50       | 10.97 | 25.00 | flops | 1.00            | 30.29     | 491.44     | 31.16      | 1.53e-03    | No       | complex64  |
| qc_rand_google53_26_15       | 10.54 | 26.00 | flops | 1.00            | 12.52     | 154.53     | 13.44      | 6.72e-04    | No       | complex128 |
| qc_rand_google53_27_20       | 11.07 | 27.00 | flops | 1.00            | 20.03     | 490.17     | 21.18      | 4.30e-04    | No       | complex64  |
| qc_rand_supremacy2d_1_12_400 | 10.11 | 25.00 | flops | 1.00            | 9.31      | 65.05      | 9.68       | 1.27e-03    | No       | complex128 |
| qc_rand_supremacy2d_4_4_100  | 11.28 | 29.00 | flops | 0.97            | 107.12    | 1836.30    | 108.99     | 1.09e-03    | No       | complex64  |
| qc_rand_supremacy2d_7_2_800  | 10.16 | 23.00 | flops | 1.00            | 5.33      | 104.70     | 4.32       | 6.45e-03    | No       | complex64  |
| qc_variational_29            | 10.11 | 29.00 | flops | 0.00            | 5.85      | 4.50       | 4.57       | 4.74e-04    | Yes      | complex128 |
| qc_variational_30            | 10.41 | 30.00 | flops | 0.00            | 3.61      | 4.67       | 5.23       | 2.23e-04    | Yes      | complex64  |
| qc_variational_31            | 10.73 | 31.00 | flops | 0.00            | 14.59     | 9.11       | 9.45       | 2.61e-04    | Yes      | complex64  |
| rnd_mixed_01                 | 11.29 | 31.68 | flops | 1.00            | 56.87     | 1356.80    | 60.23      | 2.44e-04    | No       | float64    |
| rnd_mixed_02                 | 11.72 | 31.57 | flops | 1.00            | 91.44     | 2352.18    | 92.70      | 3.62e-04    | No       | float64    |
| rnd_mixed_03                 | 11.68 | 30.82 | flops | 1.00            | 68.34     | 1665.60    | 70.49      | 5.56e-04    | No       | float64    |
| rnd_mixed_05                 | 11.73 | 31.21 | flops | 1.00            | 36.39     | 1614.23    | 38.69      | 7.36e-04    | No       | float32    |
| rnd_mixed_06                 | 10.65 | 29.29 | flops | 1.00            | 6.41      | 195.38     | 6.60       | 1.71e-03    | No       | float32    |
| rnd_mixed_07                 | 11.63 | 31.18 | flops | 1.00            | 39.40     | 1527.21    | 42.11      | 2.33e-03    | No       | float32    |
| rnd_mixed_08                 | 10.27 | 25.69 | flops | 1.00            | 1.12      | 50.03      | 1.14       | 2.25e-03    | No       | float32    |
| rnd_mixed_09                 | 11.11 | 31.15 | flops | 1.00            | 6.71      | 373.56     | 7.06       | 1.90e-03    | No       | float32    |

Continued on next page

Table 2: Runtimes of the different implementations on the benchmark instances. The flops are reported as  $\log_{10}$ , the size as  $\log_2$ .

| Name                            | Flops | Size  | Path  | Average Density | Dense (s) | Sparse (s) | Hybrid (s) | Density (s) | Switched | DType   |
|---------------------------------|-------|-------|-------|-----------------|-----------|------------|------------|-------------|----------|---------|
| rnd_mixed_10                    | 10.68 | 27.01 | flops | 1.00            | 7.30      | 196.16     | 7.25       | 2.63e-03    | No       | float32 |
| rnd_mixed_11                    | 10.93 | 29.66 | flops | 1.00            | 15.79     | 478.69     | 16.19      | 1.80e-03    | No       | float32 |
| rnd_oe_01                       | 10.90 | 28.04 | flops | 1.00            | 2.48      | 177.13     | 2.49       | 4.54e-04    | No       | float32 |
| rnd_oe_02                       | 11.86 | 27.30 | flops | 1.00            | 0.97      | 1150.62    | 0.96       | 5.51e-04    | No       | float32 |
| rnd_oe_03                       | 11.84 | 31.03 | flops | 1.00            | 40.45     | 1795.40    | 40.93      | 9.14e-04    | No       | float64 |
| rnd_oe_04                       | 11.01 | 29.26 | flops | 1.00            | 26.35     | 508.69     | 26.49      | 5.60e-04    | No       | float64 |
| str_ctg_lattice_01              | 12.31 | 30.51 | flops | 1.00            | 37.94     | 4066.06    | 38.51      | 1.49e-03    | No       | float32 |
| str_ctg_lattice_02              | 11.17 | 27.51 | flops | 1.00            | 11.14     | 431.40     | 11.25      | 2.26e-03    | No       | float32 |
| str_ctg_lattice_03              | 12.76 | 32.63 | flops | 1.00            | 157.10    | 12769.82   | 161.48     | 1.56e-03    | No       | float32 |
| str_ctg_lattice_04              | 12.58 | 32.02 | flops | 1.00            | 312.65    | 12332.65   | 315.69     | 2.19e-03    | No       | float32 |
| str_ctg_regular_01              | 11.63 | 31.15 | flops | 1.00            | 11.85     | 940.26     | 12.02      | 3.59e-04    | No       | float32 |
| str_ctg_regular_02              | 11.68 | 31.85 | flops | 1.00            | 34.09     | 1465.70    | 34.97      | 2.81e-04    | No       | float32 |
| str_ctg_regular_03              | 11.69 | 31.17 | flops | 1.00            | 26.09     | 1307.57    | 26.56      | 6.28e-04    | No       | float32 |
| str_ctg_regular_04              | 11.37 | 30.34 | flops | 1.00            | 21.58     | 774.26     | 21.31      | 4.57e-04    | No       | float32 |
| str_matrix_chain_multiplicatio_ |       |       |       |                 |           |            |            |             |          |         |
| _n_100                          | 8.48  | 17.26 | flops | 1.00            | 0.02      | 1.98       | 0.02       | 4.17e-03    | No       | float64 |
| str_matrix_chain_multiplicatio_ |       |       |       |                 |           |            |            |             |          |         |
| _n_1000                         | 8.32  | 12.11 | flops | 1.00            | 0.05      | 2.88       | 0.06       | 2.80e-04    | No       | float64 |
| str_mps_varying_inner_product_  |       |       |       |                 |           |            |            |             |          |         |
| _200                            | 8.31  | 15.48 | flops | 1.00            | 0.05      | 2.27       | 0.06       | 7.12e-03    | No       | float64 |
| str_mps_varying_inner_product_  |       |       |       |                 |           |            |            |             |          |         |
| _2000                           | 8.66  | 13.45 | flops | 1.00            | 0.18      | 7.15       | 0.31       | 2.04e-02    | No       | float64 |
| str_nw_ftps_open_28             | 9.05  | 28.00 | flops | 1.00            | 0.19      | 14.76      | 0.19       | 1.47e-04    | No       | float64 |
| str_nw_ftps_open_30             | 9.65  | 30.00 | flops | 1.00            | 0.96      | 58.16      | 0.98       | 1.61e-04    | No       | float64 |
| str_nw_ftps_open_32             | 10.24 | 32.00 | flops | 1.00            | 3.62      | 238.03     | 3.67       | 1.21e-04    | No       | float64 |
| str_nw_mera_closed_120          | 10.66 | 25.02 | flops | 1.00            | 2.46      | 91.56      | 2.49       | 2.18e-03    | No       | float64 |
| str_nw_mera_closed_247          | 12.39 | 31.98 | flops | 1.00            | 39.15     | 4824.67    | 39.15      | 5.14e-03    | No       | float64 |
| str_nw_mera_open_26             | 10.49 | 25.36 | flops | 1.00            | 0.23      | 80.47      | 0.24       | 8.72e-04    | No       | float64 |
| str_nw_peps_closed_325          | 12.56 | 32.41 | flops | 1.00            | 153.82    | 8540.10    | 160.78     | 1.74e-03    | No       | float64 |
| str_nw_peps_closed_333          | 10.05 | 23.37 | flops | 1.00            | 0.37      | 27.53      | 0.34       | 1.62e-03    | No       | float64 |
| str_nw_peps_open_30             | 11.98 | 31.32 | flops | 1.00            | 29.57     | 2153.93    | 29.47      | 2.85e-04    | No       | float64 |
| wmc_2021_061                    | 11.01 | 28.00 | flops | 0.00            | 30.62     | 0.64       | 0.99       | 4.94e-03    | Yes      | float64 |
| wmc_2021_130                    | 5.88  | 12.00 | flops | 0.86            | 0.08      | 0.07       | 0.11       | 0.00e+00    | No       | float64 |
| wmc_2021_145                    | 11.85 | 31.00 | flops | 0.00            | 134.45    | 1.02       | 1.23       | 7.02e-03    | Yes      | float64 |

Continued on next page

Table 2: Runtimes of the different implementations on the benchmark instances. The flops are reported as  $\log_{10}$ , the size as  $\log_2$ .

| Name         | Flops | Size  | Path  | Average Density | Dense (s) | Sparse (s) | Hybrid (s) | Density (s) | Switched | DType   |
|--------------|-------|-------|-------|-----------------|-----------|------------|------------|-------------|----------|---------|
| wmc_2021_183 | 9.88  | 28.00 | flops | 1.00            | 4.50      | 82.71      | 4.59       | 3.96e-04    | No       | float64 |
| wmc_2021_187 | 10.93 | 31.00 | flops | 1.00            | 21.86     | 564.82     | 22.29      | 6.69e-04    | No       | float64 |
| wmc_2022_004 | 10.33 | 29.00 | flops | 1.00            | 8.04      | 150.34     | 8.30       | 6.05e-04    | No       | float64 |
| wmc_2022_038 | 10.14 | 28.00 | flops | 0.00            | 9.49      | 0.28       | 0.35       | 1.54e-03    | Yes      | float64 |
| wmc_2022_051 | 11.22 | 30.00 | flops | 0.03            | 18.46     | 17.85      | 19.83      | 5.91e-03    | Yes      | float64 |
| wmc_2022_060 | 10.38 | 26.00 | flops | 0.01            | 16.52     | 3.35       | 3.38       | 5.85e-03    | Yes      | float64 |
| wmc_2022_082 | 11.15 | 31.00 | flops | 0.00            | 68.30     | 0.15       | 0.16       | 8.43e-04    | Yes      | float64 |
| wmc_2023_035 | 6.96  | 12.00 | flops | 0.24            | 0.17      | 0.12       | 0.19       | 0.00e+00    | No       | float64 |
| wmc_2023_036 | 10.93 | 27.00 | flops | 0.01            | 26.48     | 20.20      | 3.35       | 5.22e-03    | Yes      | float64 |
| wmc_2023_141 | 10.38 | 24.00 | flops | 0.01            | 6.06      | 12.59      | 6.70       | 6.32e-02    | Yes      | float64 |
| wmc_2023_152 | 6.46  | 15.00 | flops | 0.65            | 0.54      | 0.37       | 0.61       | 4.00e-03    | No       | float64 |

## References

- |                                                                                                  |    |
|--------------------------------------------------------------------------------------------------|----|
|                                                                                                  | 40 |
| [1] Mark Blacher, Christoph Staudt, Julien Klaus, Maurice Wenig, Niklas Merk, Alexander Breuer,  | 41 |
| Max Engel, Sören Laue, and Joachim Giesen. Einsum Benchmark: Enabling the Development of         | 42 |
| Next-Generation Tensor Execution Engines. In <i>NeurIPS</i> , 2024.                              | 43 |
| [2] Igor L Markov and Yaoyun Shi. Simulating quantum computation by contracting tensor networks. | 44 |
| <i>SIAM Journal on Computing</i> , 2008.                                                         | 45 |
